# Supplementary material
Source: PubMed Central journal article supplement (PMC4066511)
Supplement: 1400517111_pnas.201400517SI.pdf [file 1400517111_pnas.201400517SI.pdf]

# Supporting Information

Small et al. 10.1073/pnas.1400517111

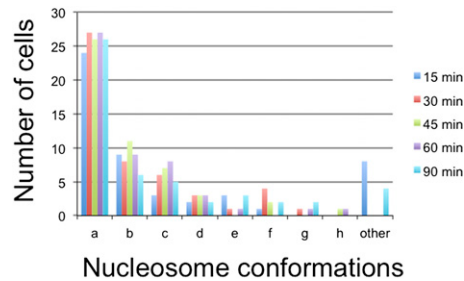

**Fig. S1.** Additional GpC protection patterns are observed when cells are incubating for shorter or longer times with GpC methyltransferase. Cells were permeabilized and incubated for 15 through 90 min with M.CviPI DNA methyltransferase as indicated. DNA was extracted, digested, and bisulfite-converted. After PCR amplification, 50 clones for each time point were sequenced. Only at 15 and 90 min were GpC protection patterns observed other than the conformations a through h.

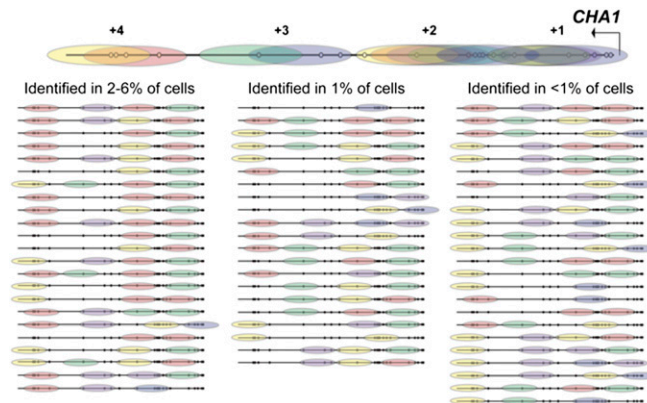

**Fig. S2.** Nucleosome architectures for *CHA1*. Nucleosome architecture of 481 cells from two bulk experiments revealed 68 conformations of nucleosomes in the 5' region of *CHA1*. An overlay of all possible nucleosome positions is depicted.

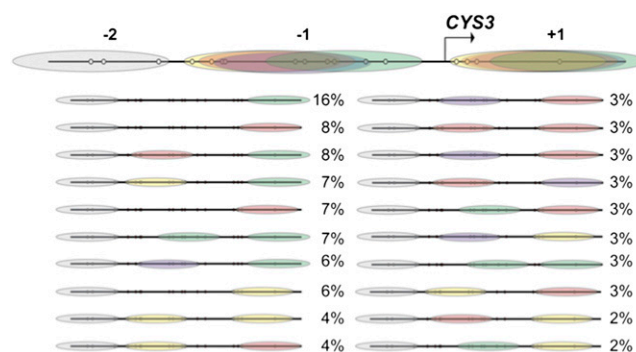

**Fig. S3.** Nucleosome architectures for *CYS3*. Nucleosome architecture of 550 cells from two bulk experiments revealed 20 conformations of nucleosomes in the *CYS3* promoter. An overlay of all possible nucleosome positions is depicted.



**Table S1. Sequences of primers used in this study**

| Primer                                  | Sequence                              |
|-----------------------------------------|---------------------------------------|
| <b>Bisulfite sequencing primers</b>     |                                       |
| Pho5_BiS_F                              | TATAAGGATTTGAAAGTTGTATTTAATAAGA       |
| Pho5_BiS_R                              | ATCTTTTGGGTACCAATCTTGTGACATC          |
| Cha1_BiS_F                              | AATATTATTATTATGTTAATTTTTTTGGAAAG      |
| Cha1_BiS_R                              | CCTTAAATAATACCATTATATAAACCACTCC       |
| Cys3_BiS_F                              | TTAGAGATTTTGAATTAATGATGATTTTTATTAGTGG |
| Cys3_BiS_R                              | CTTTCCAATTTCTCTATTAAAAATTTAAAAATC     |
| <b>PHO5 Nucleosome scanning primers</b> |                                       |
| Pho5_1F                                 | ATGCGCAAATATGTCAACG                   |
| Pho5_2F                                 | TCATCTTATGTGCGCTGCT                   |
| Pho5_3F                                 | GCGGACGTCGCTATAAACTT                  |
| Pho5_4F                                 | TCAAACGAAGGTAAAAGTTCA                 |
| Pho5_5F                                 | GTTTTCGCATAGAACGCAAC                  |
| Pho5_6F                                 | AACGCAACTGCACAATGC                    |
| Pho5_7F                                 | CAACTGCACAATGCCAAAA                   |
| Pho5_8F                                 | AAATGAATCGATACAACCTTGG                |
| Pho5_9F                                 | CTCACACGTGGGACTAGCA                   |
| Pho5_10F                                | TTTTCGAAGAGATCGACA                    |
| Pho5_11F                                | TTTTCGAAGAGATCGACA                    |
| Pho5_12F                                | GGCAAGGCATATACCCATT                   |
| Pho5_13F                                | TGAATTGTGAAATGAAACGTA                 |
| Pho5_14F                                | ATAAGCGCTGATGTTTTGCTAAG               |
| Pho5_15F                                | AGTCGAGGTTAGTATGGCTTCA                |
| Pho5_16F                                | CAAGCAAATTCGAGATTACCAA                |
| Pho5_1R                                 | AAGCGCTATGAACCTTTTACCT                |
| Pho5_2R                                 | CAGACAAAGAAAAAGCGCTATGA               |
| Pho5_3R                                 | CAGTTGCGTTCTATGCGAAA                  |
| Pho5_4R                                 | GCATTGTGCAGTTGCGTTCT                  |
| Pho5_5R                                 | CCAAGGTTGTATCGATTCATT                 |
| Pho5_6R                                 | AGTCCACGTGTGAGTGC                     |
| Pho5_7R                                 | AGTCCACGTGTGAGTGC                     |
| Pho5_8R                                 | TAATTTGGCATGTGCGATCT                  |
| Pho5_9R                                 | TGCCTTGCCAAGTAAGGTG                   |
| Pho5_10R                                | TCGACAATTCAAAGATGTTTACC               |
| Pho5_11R                                | CCTCGACTTAGCAAAACATCA                 |
| Pho5_12R                                | TGAAGCCATACTAACCTCGACT                |
| Pho5_13R                                | AATCTCGAATTTGCTTGCTCT                 |
| Pho5_14R                                | ATTGGTAATCTCGAATTTGCTTG               |
| Pho5_15R                                | GCCTAAGGGAATGGTACCTG                  |
| Pho5_16R                                | TGTCGACATCGGCTAGTTTG                  |
| <b>CHA1 Nucleosome scanning primers</b> |                                       |
| Cha1_1F                                 | CCGGAAGGCTTCTGCAC                     |
| Cha1_2F                                 | CCGGAAGGCTTCTGCAC                     |
| Cha1_3F                                 | CAACCAAGTGGCTCCTTCA                   |
| Cha1_4F                                 | CAACCAAGTGGCTCCTTCA                   |
| Cha1_5F                                 | TCATGAAAAGTGCCATTCG                   |
| Cha1_6F                                 | CCTCAGGTTTTCGTAGTTCTG                 |
| Cha1_7F                                 | AATGCCGGTTTTGCTGCT                    |
| Cha1_8F                                 | TGCTGCAACAGCATGTCA                    |
| Cha1_9F                                 | GTACAGTCGTGGTTCCTACAGC                |
| Cha1_10F                                | ACACCGGTGCCAGGTTA                     |
| Cha1_11F                                | ACACCGGTGCCAGGTTA                     |
| Cha1_12F                                | TGCCTACTGGAAAGAAGCAG                  |
| Cha1_13F                                | TGAGCCATTTATGTTTATCC                  |
| Cha1_14F                                | CCGGATATTTGGGAAGGAC                   |
| Cha1_15F                                | TCGCAACATATTTCCGTGA                   |
| Cha1_1R                                 | TGGCACTTTTCATGATGAGATT                |
| Cha1_2R                                 | TTTTGAATTCGAATGGCACT                  |
| Cha1_3R                                 | CGCCAGAAGTAGCGAAAAC                   |
| Cha1_4R                                 | GCAGCAAAACCGGCATTA                    |
| Cha1_5R                                 | CAGTCTTTGACATGCTGTTGC                 |

Table S1. Cont.

| Primer                           | Sequence                                                              |
|----------------------------------|-----------------------------------------------------------------------|
| Cha1_6R                          | TCGCTGTAGGAACCACGAC                                                   |
| Cha1_7R                          | GGCACCGGTGTTCCCTGAT                                                   |
| Cha1_8R                          | GGCACCGGTGTTCCCTGAT                                                   |
| Cha1_9R                          | GTATCTGCTTCTTTCCAGTAGGC                                               |
| Cha1_10R                         | GGGCTCAATGACCTGAGAG                                                   |
| Cha1_11R                         | CCGGATTATCGAAGGGATG                                                   |
| Cha1_12R                         | CCGGATTATCGAAGGGATG                                                   |
| Cha1_13R                         | CACGGAAATATGTTGCGATT                                                  |
| Cha1_14R                         | CCTCCACCAACGCTGCAT                                                    |
| Cha1_15R                         | CAGCTAAACCATACTTTCCAA                                                 |
| CYS3 Nucleosome scanning primers |                                                                       |
| Cys3_1F                          | CCACGTCCCCATCAAAC                                                     |
| Cys3_2F                          | GACGCTGAGCTGTATCACG                                                   |
| Cys3_3F                          | GGCAGAGGACCTCGCTTG                                                    |
| Cys3_4F                          | CCAACCCGGTGGACAAAC                                                    |
| Cys3_5F                          | AACGAGATTAGCGACCTCGAA                                                 |
| Cys3_6F                          | ACTCCTTCCCGGGTGCTC                                                    |
| Cys3_7F                          | CAACGACGACTTCCACCA                                                    |
| Cys3_8F                          | CACACTGGACCCCATACCA                                                   |
| Cys3_9F                          | TCACGTGATCTCAGCCAGTT                                                  |
| Cys3_10F                         | TGCCAGGTAGATGGAAGTGG                                                  |
| Cys3_11F                         | GTGCCGTGCCAGATTGAA                                                    |
| Cys3_12F                         | TTGAGGCCTATACACATAGACATTT                                             |
| Cys3_13F                         | TGCTACCAAGGCCATTCA                                                    |
| Cys3_14F                         | CCATTGATGCCGGTGAAC                                                    |
| Cys3_15F                         | CCCATTCTTTGTCCACCA                                                    |
| Cys3_16F                         | CAGAGAGAACTTGAAAGAGCA                                                 |
| Cys3_1R                          | GCTTTGCAAGCGAGGTC                                                     |
| Cys3_2R                          | CACCGGTTGGCTCTGTA                                                     |
| Cys3_3R                          | GGCCTTCGAGGTCGCTAA                                                    |
| Cys3_4R                          | GAGCACCCGGGAAGGAGT                                                    |
| Cys3_5R                          | GGCCCACTGGTGGAAAGTC                                                   |
| Cys3_6R                          | GGTATGGGGTCCAGTGTGG                                                   |
| Cys3_7R                          | AGGGTGGAAATTACATAGCGTTAC                                              |
| Cys3_8R                          | CGCCCAACTGGCTGAGA                                                     |
| Cys3_9R                          | ACCTGGCATCTTATGCTTTAAATA                                              |
| Cys3_10R                         | CTTGTGTGTATATGTATAAGGTGCAAA                                           |
| Cys3_11R                         | TGGTAGCAAATTTATCAGATTCTTG                                             |
| Cys3_12R                         | GGCCTTGGTAGCAAATTTATCA                                                |
| Cys3_13R                         | GGGTTAGCTGGAGAAGATTGTT                                                |
| Cys3_14R                         | ACCGATAGGGTTAGCTGGAG                                                  |
| Cys3_15R                         | CGGCAACTGCTCTTTCCA                                                    |
| Cys3_16R                         | GAAGCGATTGCAAGATTGTGG                                                 |
| PHO5 QuikChange primers          |                                                                       |
| ECS54_F                          | CGCACATGCCAAATTATAAAATTAATCACCTTACTTGG                                |
| ECS54_R                          | CCAAGTAAGGTGATTAATTTTATAATTTGGCATGTGCG                                |
| ECS45_F                          | GATTAAGAATAATTAATAATAGGCAATC                                          |
| ECS45_R                          | GATTGCCTATTTAATAATCTTTTAATC                                           |
| ECS62_F                          | ATGTAAGCGGACGTCGCTATAAACTTCAAAAAAAAAAAGGTTTCATAGCGCTTTTCTTTGCTG       |
| ECS62_R                          | CAGACAAAGAAAAAGCGCTATGAACCTTTTTTTTTTTTTTTGAAGTTTATAGACGACGTCGCTTACAT  |
| ECS68_F                          | CAACGTATTTGGAAGTCATCTTATGTGCGCTGCTTTTTTTTTTTCTCATGTAAGCGGACGTCGCTATAA |
| ECS68_R                          | TTATAGACGACGTCGCTTACATGAGAAAAAAGCAGCGCACATAAGATGACTTCCAATACGTTG       |
| ECS53_F                          | GTTTTCTTATGTAAGCTTACGTCGTC                                            |
| ECS53_R                          | GACGACGTAAGCTTACATAAGAAAAC                                            |
| ECS56_F                          | GCGCAAATATGTCAAAGTATTTGGAAG                                           |
| ECS56_R                          | CTTCCAATACTTTGACATATTTGCGC                                            |

F, forward; R, reverse.

## Other Supporting Information Files

[Dataset S1 \(XLSX\)](#)
